# Supplementary material for: The long noncoding RNA lncNB1 promotes tumorigenesis by interacting with ribosomal protein RPL35
Source: PubMed Central journal article supplement (PMC6831662; doi:10.1038/s41467-019-12971-3), 2019-11-05
Supplement: 41467_2019_12971_MOESM3_ESM.pdf [file 41467_2019_12971_MOESM3_ESM.pdf]

## **Description of Additional Supplementary Files**

File Name: Supplementary Data 1

Description: Genes differentially expressed between four MYCN gene-amplified [BE(2)-C, Kelly, CHP134 and SK-N-DZ] and two MYCN-non-amplified (SY5Y and SK-N-AS) neuroblastoma cell lines, as identified by RNA sequencing. FC and CPM represented fold change and counts per million reads, and FDR represented false discovery rate. Transcripts with an absolute log<sub>2</sub> fold change of >1 and a false discovery rate of <0.05 were listed.
